# Supplementary material for: Identification of prognostic signatures in remnant gastric cancer through an interpretable risk model based on machine learning: a multicenter cohort study
Source: Springer Nature journal article supplement (doi:10.1186/s12885-024-12303-9), 2024-04-30

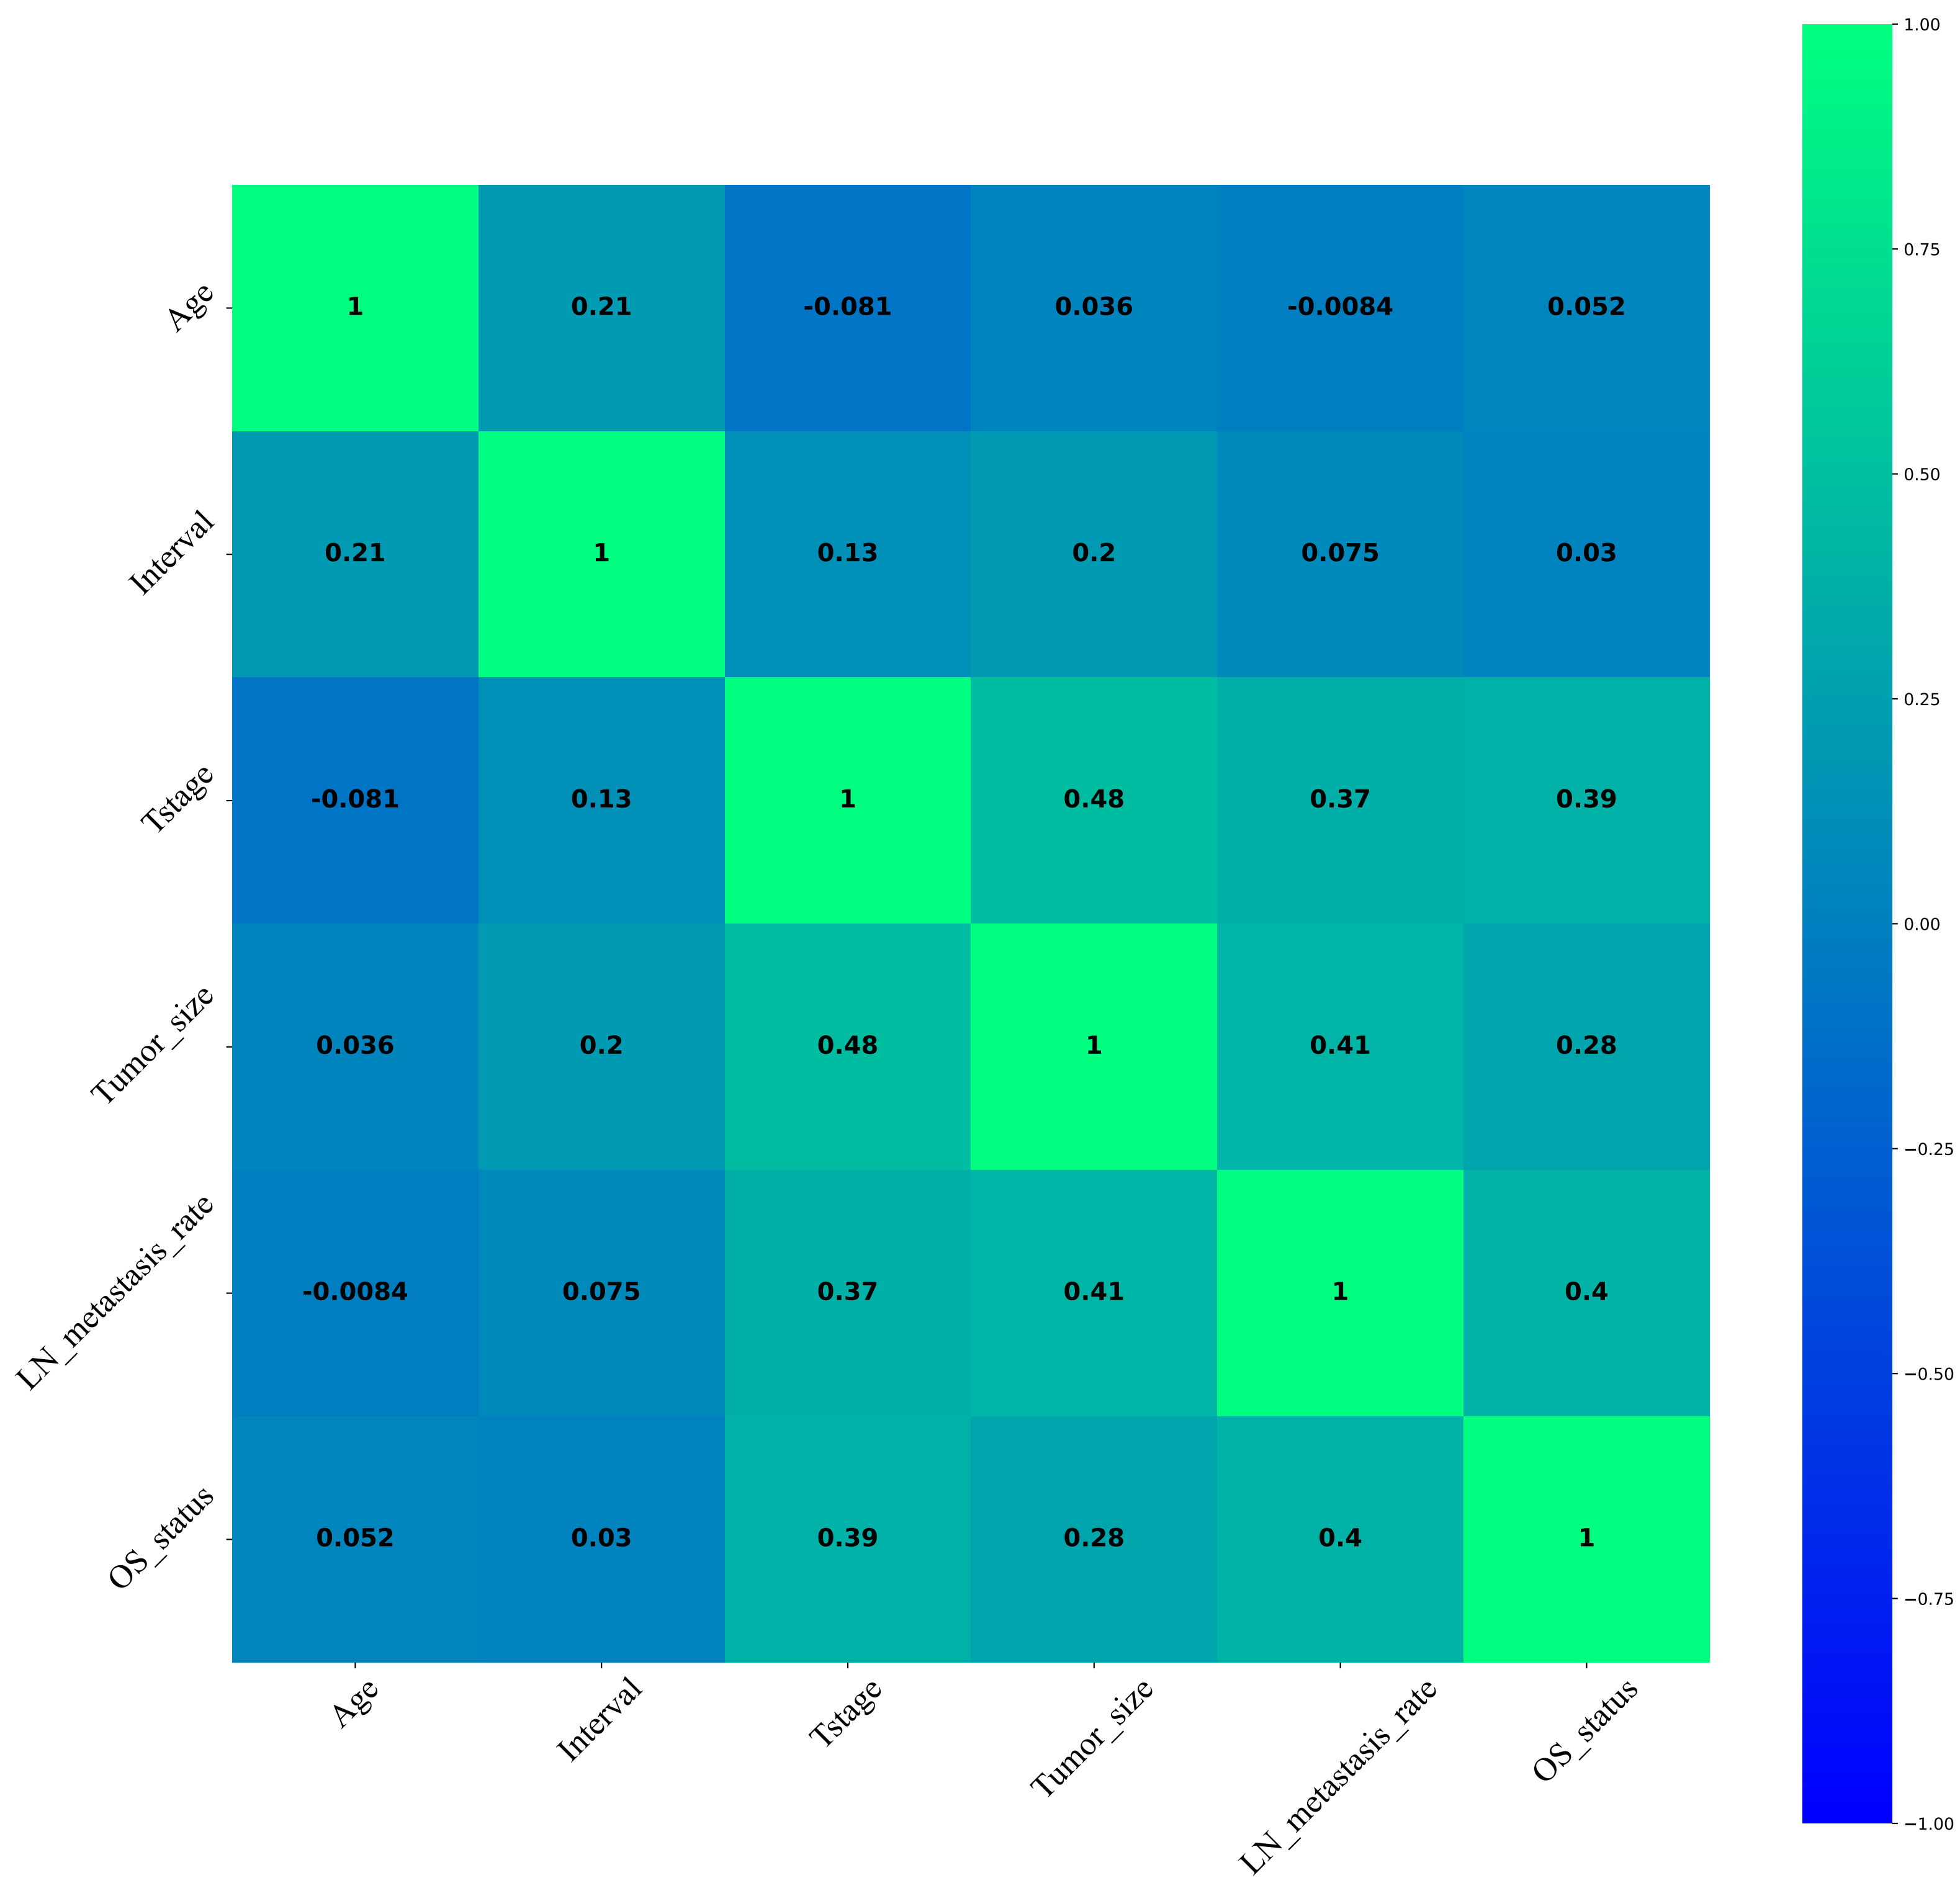

Supplement: MOESM1 [file 27043640]
