# Supplementary material for: Identification of prognostic signatures in remnant gastric cancer through an interpretable risk model based on machine learning: a multicenter cohort study
Source: Springer Nature journal article supplement (doi:10.1186/s12885-024-12303-9), 2024-04-30

ROC on test set of ANN

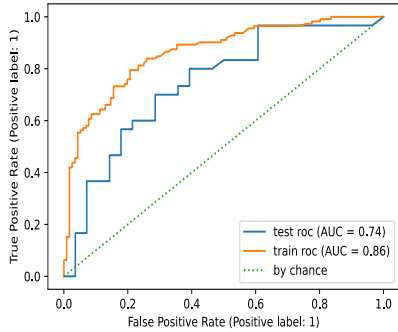

ROC on test set of CatBoost

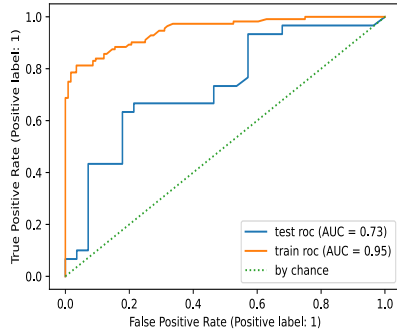

ROC on test set of Decision Tree

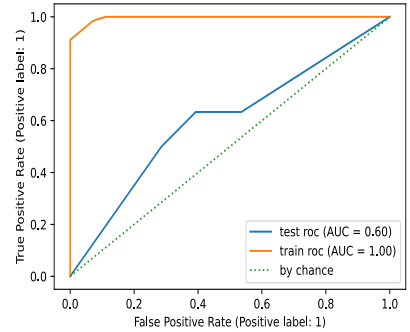

ROC on test set of GBM

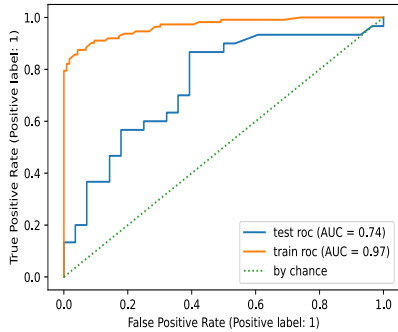

ROC on test set of GNB

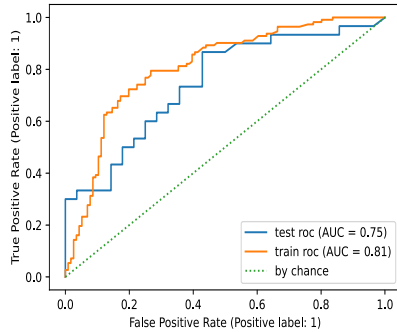

ROC on test set of KNN

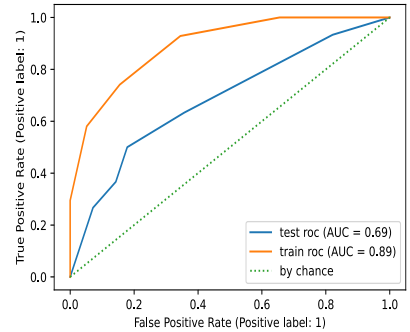

ROC on test set of Logistic

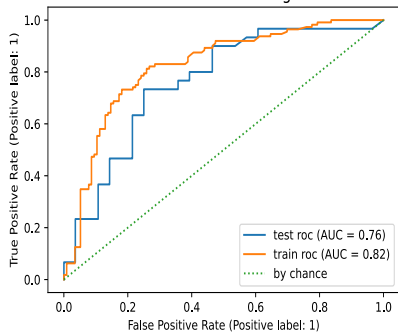

ROC on test set of Random Forest

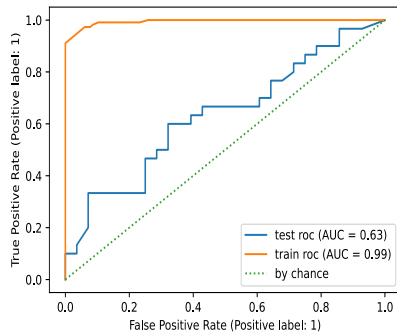

ROC on test set of SVM

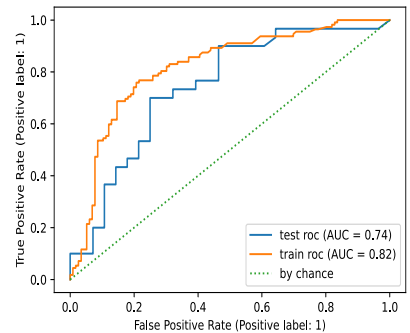

Supplement: MOESM2 [file 27043640]
